# Supplementary material for: Persistent Purine Metabolic Abnormality Induces the Aggravation of Visceral Inflammation and Intestinal Microbiota Dysbiosis in Magang Goose
Source: Frontiers journal article supplement (doi:10.3389/fvets.2021.737160), 2021-09-06
Supplement: Data_Sheet_1.pdf [file Data_Sheet_1.pdf]

**Table S1.**Effect of HPC meal-based diet on growth performance from 14 to 28 days of Magang geese

| Item                              | d 14 HCP    | d 28 HCP     |
|-----------------------------------|-------------|--------------|
| Weight (g)                        | 231.60±4.50 | 484.00±16.01 |
| Average daily gain (ADG)<br>(g/d) | 16.56±0.71  | 18.02±2.69   |
| Mortality rate %                  | 18.56       | 22.33        |

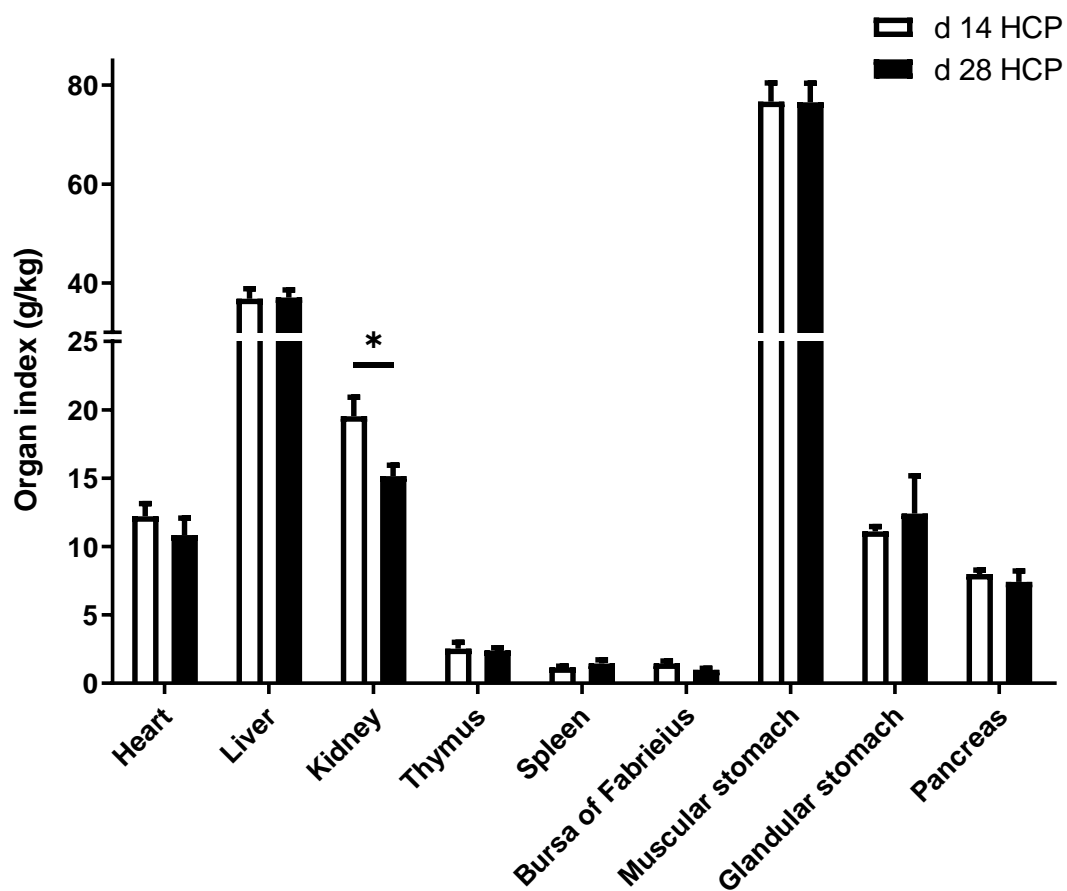

**Figure S1.** Effect of HPC meal-based diet on organ indexes from 14 to 28 days of Magang geese. \* mean significant difference ( $p < 0.05$ ).

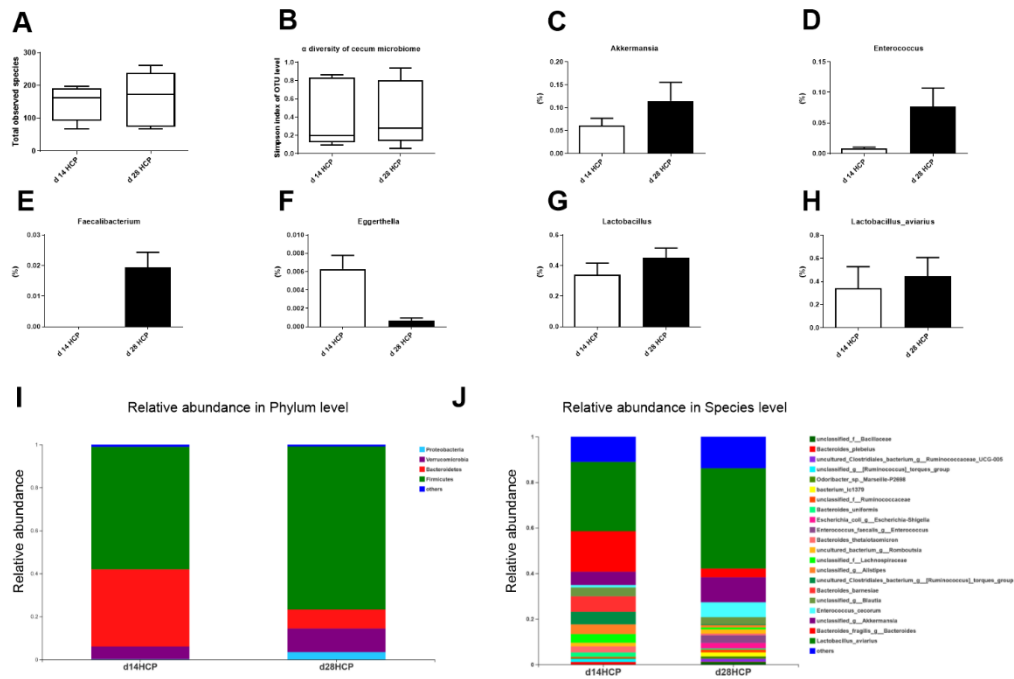

**Figure S2.** Effect of HPC meal-based diet on cecum microbial diversity of Magang geese on d 14 and d 28. **(A)** Total observed species. **(B)** Alpha diversity: Simpson index. **(C-H)** Comparisons among groups on the relative abundance of the most differential *Akkermansia*, *Enterococcus*, *Faecalibacterium*, *Eggerthella*, *Lactobacillus* and *Lactobacillus\_avarius*. Error bars represent the standard error of the mean. (n = 6/group). **(I)** Relative abundance of bacteria at Phylum level. OTUs with an occurrence lower than 1% are not represented. **(J)** Relative abundance of Species in each group.
